# Supplementary material
Source: PubMed Central journal article supplement (PMC4216733)

## Supplementary Figure Legends

**Supplementary Figure 1: Quantification of proteins and genes related to hepatic inflammation, angiogenesis and fibrosis.** Chronic toxic liver injury of c57BL/6 wildtype mice was induced by 6 weeks of carbon tetrachloride (CCl<sub>4</sub>) treatment twice weekly. Another group of animals additionally received thrice weekly subcutaneous injections of mNOX-E36 (anti-CCL2 agent). (A) Representative microscopy images of CD31 immunofluorescence. (B-C) Quantification of collagen deposition in chronically injured and mNOX-E36 treated livers by determination of hydroxyproline content (B) or Sirius Red area fraction (C). (D-E) Serum ALT (D) and AST (E) activity representing the injury in CCl<sub>4</sub> or CCl<sub>4</sub> & mNOX-E36 treated livers in comparison to healthy control livers. (F) Hepatic gene expression profiling of inflammation, angiogenesis and fibrosis associated genes. Data are shown as mean ± SD. ### < 0.001 and ## < 0.01 for the comparison of CCl<sub>4</sub> or CCl<sub>4</sub> + mNOX-E36 vs. the corresponding control groups (i.e. 6 weeks oil or 6 weeks oil + mNOX-E36) (n=30 mice; unpaired Student's *t* test).

**Supplementary Figure 2: Effects of CCL2 and mNOX-E36 on cell viability and sprouting activity of primary murine endothelial cells *in vitro*.** (A) Endothelial cells were isolated from murine livers and cultured with VEGF containing medium, followed by stimulation with CCL2, mNOX-E36 or CCL2 + mNOX-E36 for 24 h or were left unstimulated. (B) Quantification of cell viability by MTT test. Cells were pooled from n=3 c57BL/6 wild-type mice. (C) Aortic rings were isolated from the thoracic aorta of c57BL/6 wildtype mice, embedded in Matrigel and cultured with VEGF containing medium, followed by stimulation with CCL2, mNOX-E36 or CCL2 & mNOX-E36 for 10 days or were left unstimulated. (D) Angiogenic sprouting was not affected by CCL2, mNOX-E36 or CCL2 & mNOX-E36 (n=3 aortic rings per condition; unpaired Student's *t* test).

**Supplementary Figure 3: Vascular branching analysis for quantifying areas of sprouting angiogenesis in a model of cholestatic hepatic injury.** (A) Ex vivo high-resolution μCT-based quantification of the mean total number of branching points in livers with a chronic cholestatic injury caused by bile duct ligation (BDL) 21 days ago and sham control animals. All analyses were performed by quantifying the total amount of branching points in 5 representative blood vessels for each, the central and the portal vein system. Data are shown as mean ± SD; \*\*\*P < 0.001, (unpaired Student's *t* test). (B) Ex vivo μCT-based quantification of the percentage of branching points per increasing order (1<sup>st</sup> to 11<sup>th</sup> branching order) for livers of sham control and mice suffering from a BDL 21 days ago. \*\*\*P < 0.001 (unpaired Student's *t* test).

# Supplement Figure 1

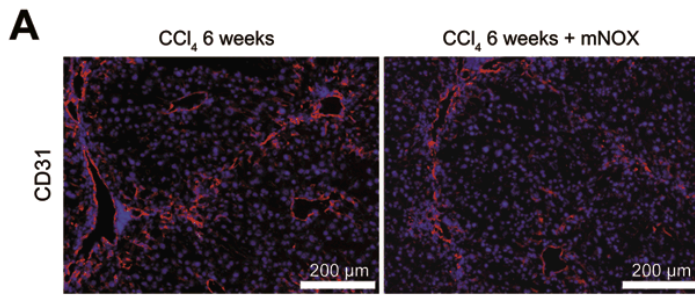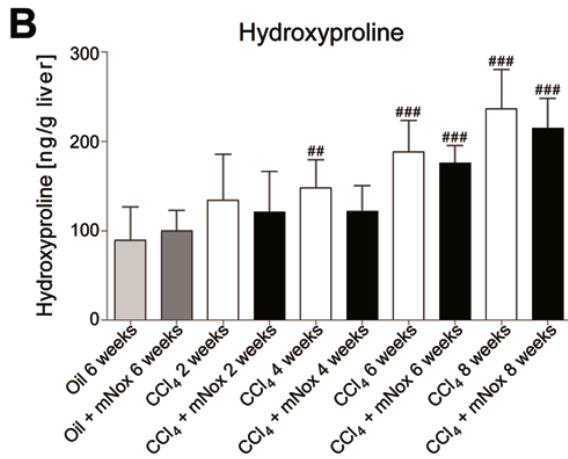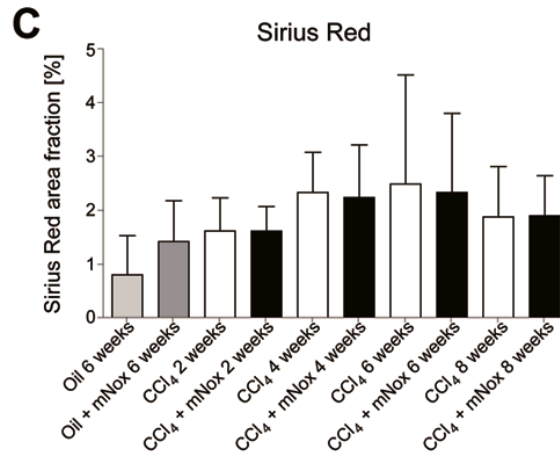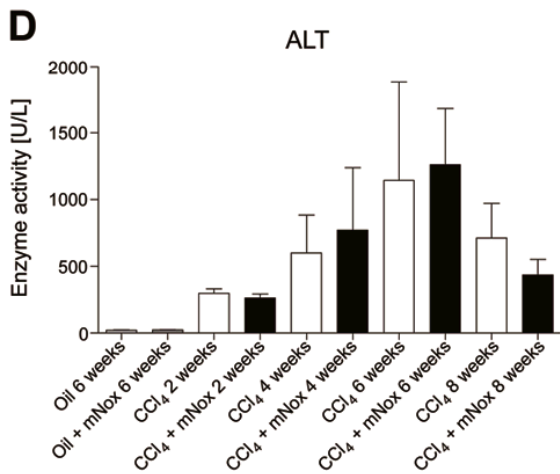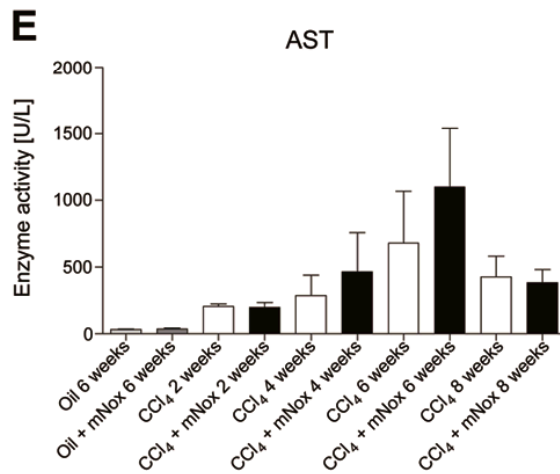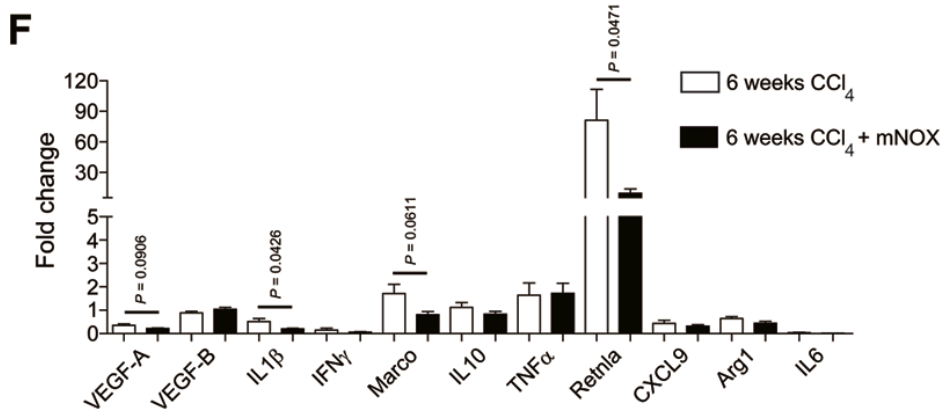

## Supplement Figure 2

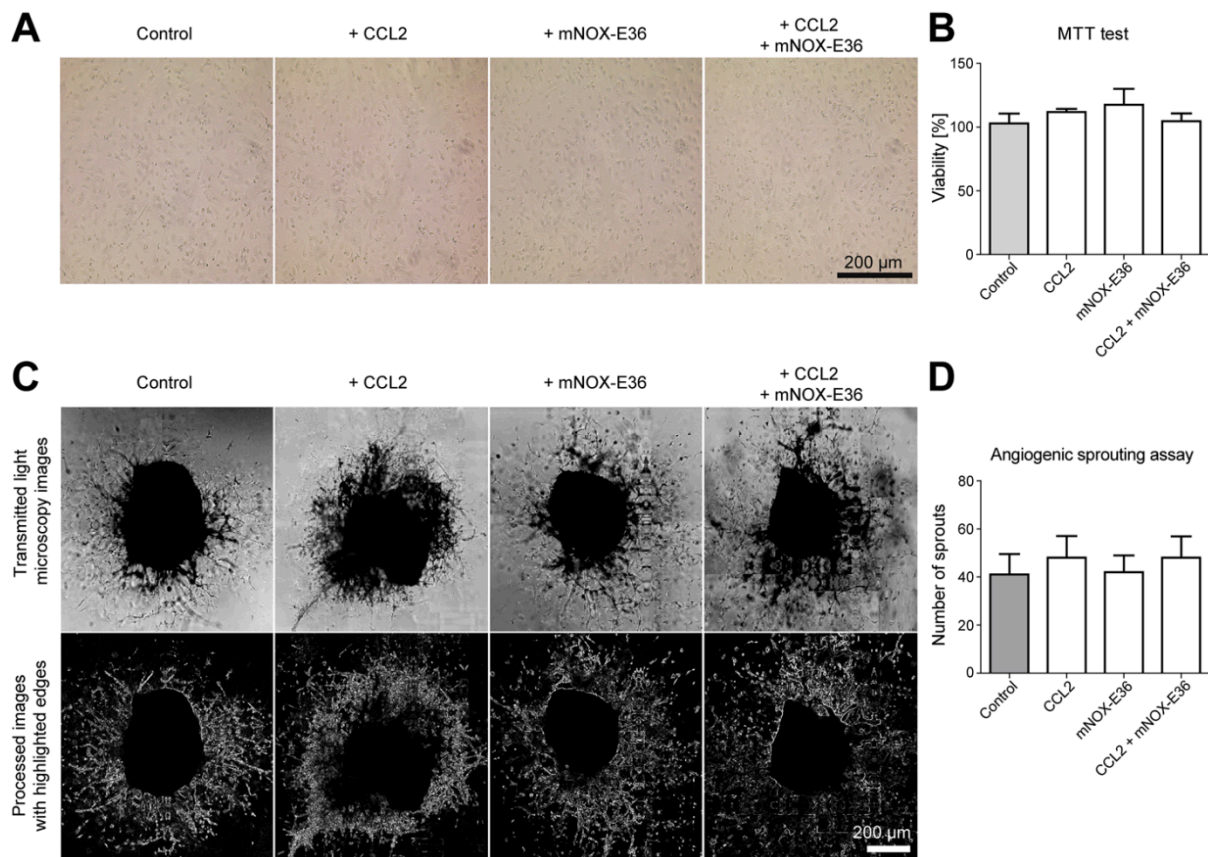

### Supplement Figure 3

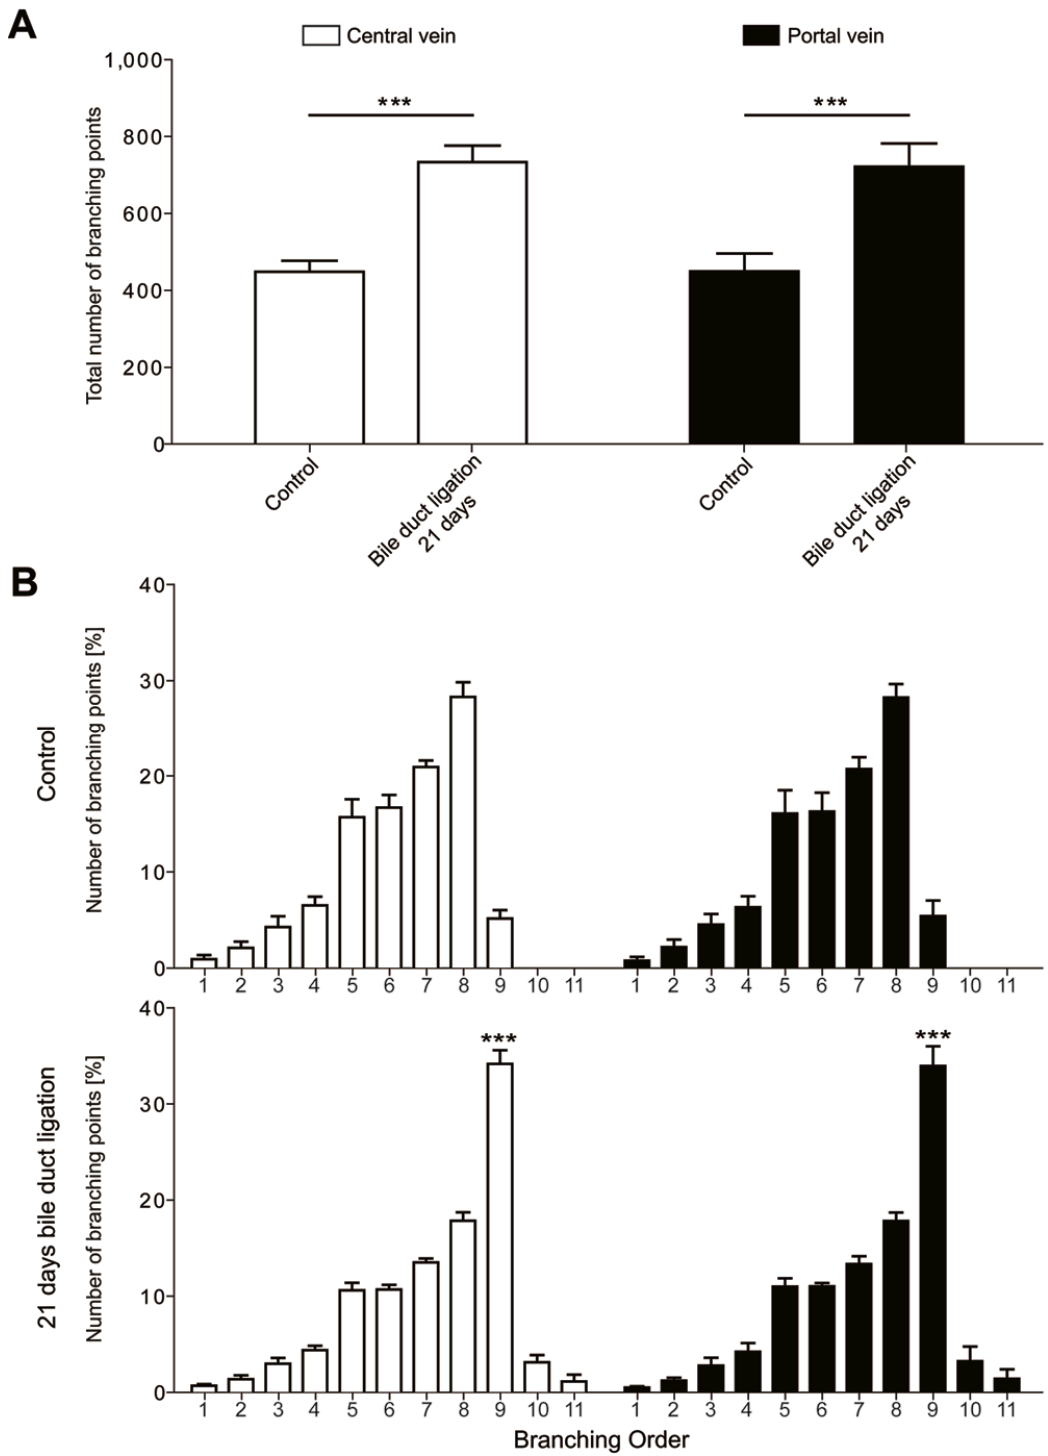

Supplement: NIHMS60546-supplement-01.pdf [file NIHMS60546-supplement-01.pdf]
